# Supplementary material for: Cis-eQTL analysis and functional validation of candidate susceptibility genes for high-grade serous ovarian cancer
Source: PubMed Central journal article supplement (PMC4580986; doi:10.1038/ncomms9234), 2015-09-22
Supplement: NIHMS712803-supplement-1.pdf [file NIHMS712803-supplement-1.pdf]

**Supplementary Figure 1. Establishment of a p53-deficient ovarian epithelial cell line.** (a) IOE11 cells were transfected with a dominant negative p53 (DNp53) vector (pcDNA3.1-DNp53) or the vector backbone as a control (pcDNA3.1). (a) Detection of endogenous and DNp53 by Western blotting. MCF10A cell lysate was used as a positive control for wild type p53. (b) Parental IOE11 and IOE11-DNp53 cells were treated with 6 Gy ionising radiation (IR). Parental cells upregulate p21 expression following IR treatment, whereas IOE11-DNp53 cells do not, demonstrating a loss of functional p53 signaling following DNA damage. (c) Growth curves. Cells expressing DNp53 have a shorter population doubling time than control cells. (d) Cell cycle analysis using propidium iodide staining. We detected a small, albeit non-statistically significant, increase in the proportion of cells in G2 following expression of the DNp53 construct. (e) After passage 13, we detected a significantly increased proportion of aneuploid cells (>4N) in the IOE11-DNp53 cultures compared to controls (two-tailed paired T-test). Error bars show mean  $\pm$  standard deviation.

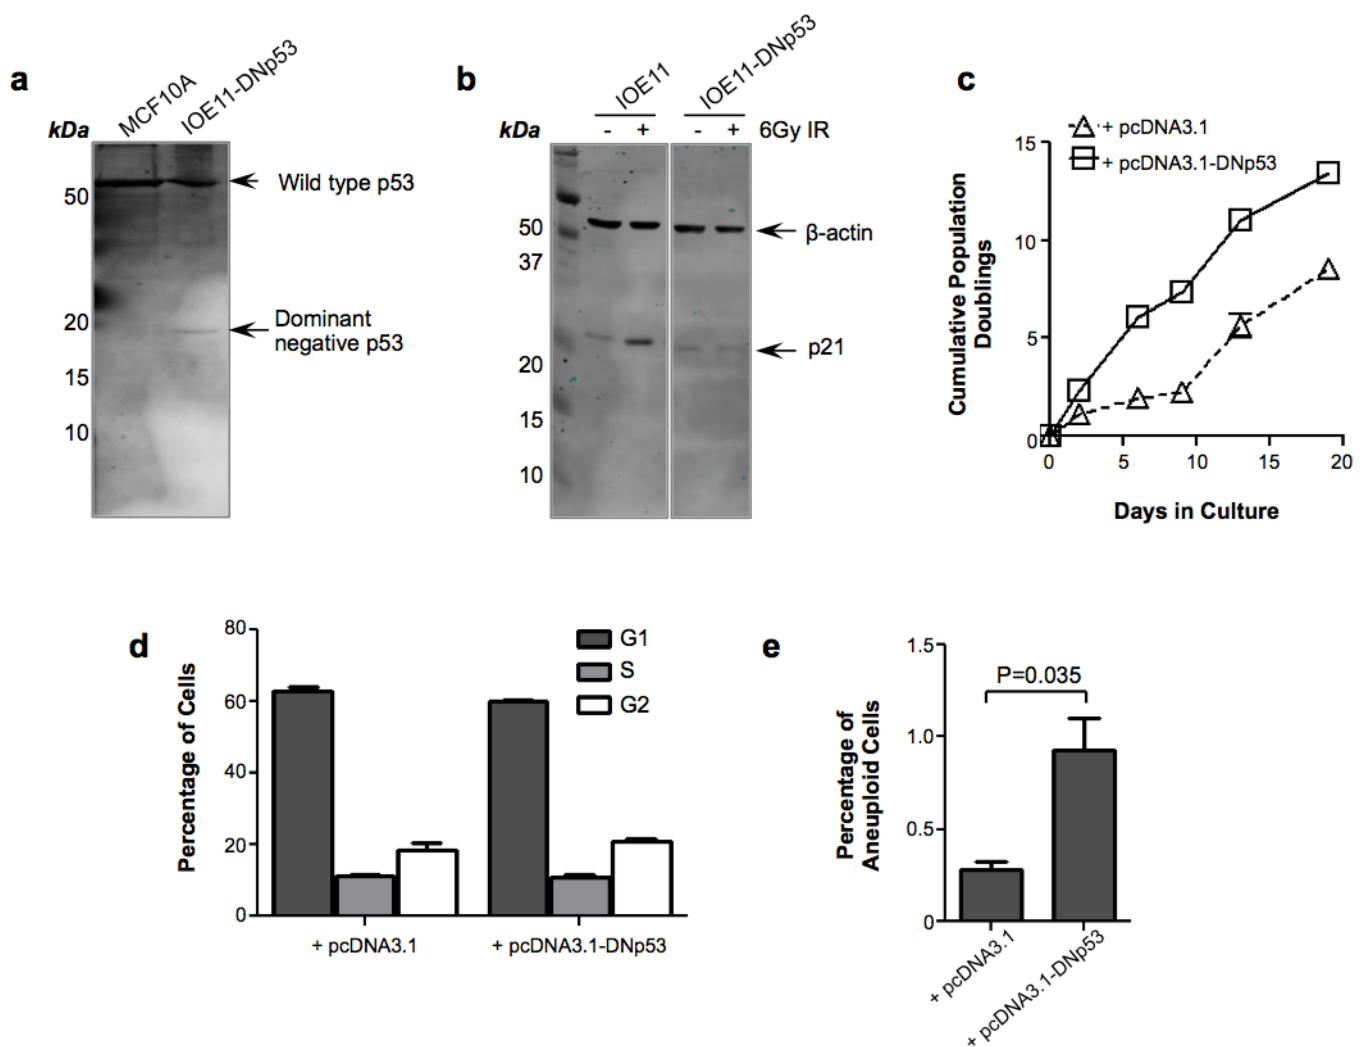

**Supplementary Figure 2. Validation of *HOXD9* genes identified by RNAseq.** (a) IOSE11-DNp53 and (b) FT246 models. The ratio of gene expression in *HOXD9* OE cells compared to GFP expressing cells is shown, measured by RNAseq and RT-qPCR, performed using TaqMan gene expression probes.

**(a) IOSE11-DNp53**

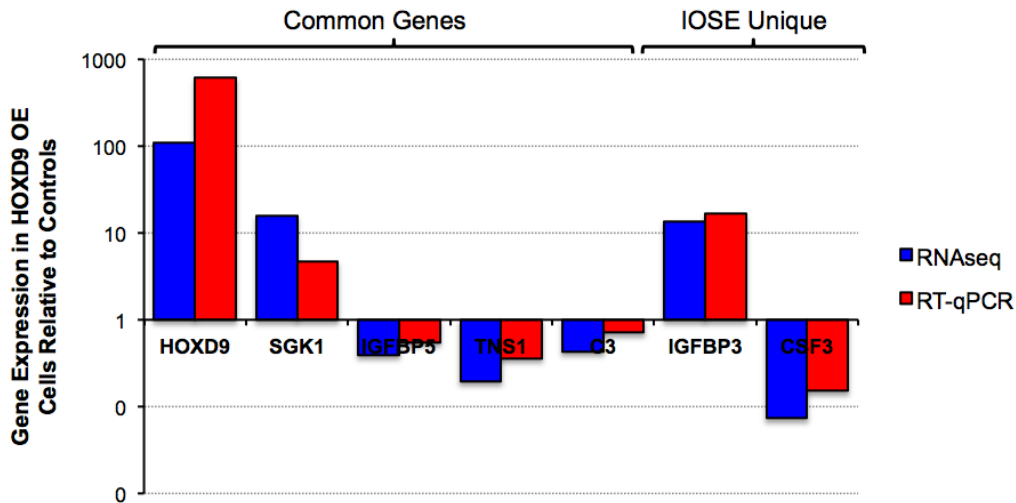

**(b) FT246**

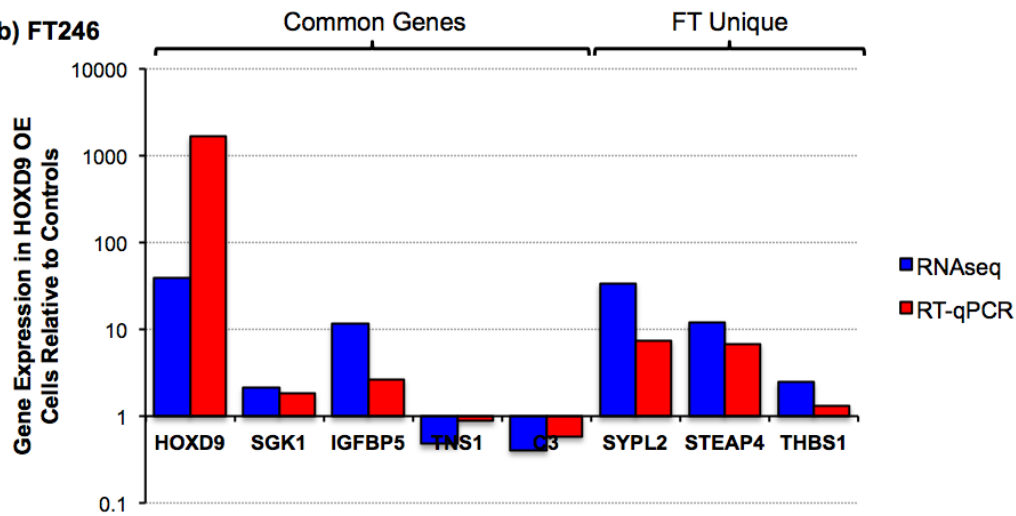

**Supplementary Table 1.** The forty-seven HGSOC risk SNPs used in the eQTL analyses.

| <b>SNP</b>       | <b>Chromosome</b> | <b>Position</b> |
|------------------|-------------------|-----------------|
| rs2268177        | 1                 | 22415410        |
| rs4335340        | 1                 | 38098035        |
| rs140656631      | 1                 | 152076102       |
| rs147001887      | 1                 | 233131754       |
| rs6755777        | 2                 | 177043226       |
| rs10172595       | 2                 | 232387063       |
| rs113156482      | 3                 | 27385515        |
| rs149825468      | 3                 | 79402822        |
| rs62274042       | 3                 | 156435952       |
| rs17329882       | 4                 | 119949960       |
| chr4:185470586:I | 4                 | 185470586       |
| rs10069690       | 5                 | 1279790         |
| rs463548         | 5                 | 54491914        |
| rs74959519       | 5                 | 84618055        |
| chr5:164862654:I | 5                 | 164862654       |
| rs143589614      | 5                 | 175418049       |
| rs80077411       | 6                 | 595273          |
| rs115344852      | 6                 | 28486098        |
| rs187759744      | 6                 | 32539152        |
| rs7763414        | 6                 | 151405377       |
| rs62430802       | 7                 | 929439          |
| rs1881116        | 7                 | 1053958         |
| rs62451762       | 7                 | 7108188         |
| rs76837345       | 8                 | 82668818        |
| rs10088218       | 8                 | 129543949       |
| rs4631563        | 9                 | 16913286        |
| chr9:136138765:D | 9                 | 136138765       |
| rs1802669        | 10                | 21827796        |
| rs16937956       | 11                | 8404501         |
| rs11024093       | 11                | 16992395        |
| rs10501153       | 11                | 36386755        |
| chr11:86642872:I | 11                | 86642872        |
| rs9559508        | 13                | 109805793       |
| rs1315145        | 14                | 33846320        |
| chr14:42173641:I | 14                | 42173641        |
| rs71402493       | 16                | 10620039        |
| rs4785001        | 16                | 58964191        |
| rs75846557       | 16                | 62734617        |
| rs4782985        | 16                | 84537527        |
| chr17:29181220:I | 17                | 29181220        |
| rs757210         | 17                | 36096515        |
| rs146746174      | 17                | 43569909        |
| rs7207826        | 17                | 46500673        |
| rs78013533       | 17                | 60480968        |
| rs4808075        | 19                | 17390291        |
| rs6026492        | 20                | 57330569        |
| rs6005807        | 22                | 28934313        |

**Supplementary Table 2.** Primers used for 3C.

For mapping interactions using agarose gel electrophoresis

|           |                       |
|-----------|-----------------------|
| HOXD9-1   | TGAGCTGGGCAACTTGTAGA  |
| Target-1  | CACCTCCAAAGAAATGGGTCT |
| Target-2  | GTGGGAAAGGGAGAAAGGAT  |
| Target-3  | CCCACCAATACATCAATACCG |
| Target-4  | ACTGGCCAGAGCTGAGAGTC  |
| Target-5  | ACTGGGTGGCGTGAAAGTT   |
| Target-6  | GGACCAGCTGGCTTGAGA    |
| Target-7  | TTTTCAGGAAGATGCCCAAT  |
| Target-8  | TGCAGGTGGAGGGAAAATA   |
| Target-9  | AGTTTAGTGGGCGAATCAGC  |
| Target-10 | TCCCCAAGCCTAGGTGATTA  |
| Target-11 | GCCAAATCACAGCCCAATA   |
| Target-12 | CTGCCTGCCACAACAGAAG   |
| Target-13 | CCACAGTCCTCACCACAGTTT |
| Target-14 | GAGGTTTGCACACACAGTCG  |
| Target-15 | ATCTTGGGCAAATGTCCTG   |
| Target-16 | TTTGATGGCTCCATTGTTCA  |
| Target-17 | GAGGTGTGGTCAAATGTTCC  |
| Target-18 | TTCAGAGCCCTCTCCTTCAA  |
| Target-19 | AGCATGGTGCGAAAAAGTCT  |

For quantitative 3C:

| Primer # | Sequence                    | Genomic distance kb from HOXD9 promoter (kb) |
|----------|-----------------------------|----------------------------------------------|
| 1        | GAAGGTCATTGTAAGTGAGGGTTT    | 4                                            |
| 2        | GAGGTCTATTTCCAAGGCTGTG      | 7                                            |
| 3        | TACGGATACGATAACTTACAGAGACAG | 10                                           |
| 4        | CCTCCACTCTTGGGCTTCTA        | 32                                           |
| 5        | GAGAGGAGGAGGGAGAGGAA        | 41                                           |
| 6        | AGTTTAGTGGGCGAATCAGC        | 46                                           |
| 7        | TCCCCAAGCCTAGGTGATTA        | 48                                           |
| 8        | CTGCCTGCCACAACAGAAG         | 50                                           |
| 9        | GAGGTTTGCACACACAGTCG        | 53                                           |
| 10       | AGCATGGTGCGAAAAAGTCT        | 60                                           |
| 11       | CCTCTAACGACCTGACACTTTTTTC   | 85                                           |

**Supplementary Table 3. Studies contributing to the three EOC GWAS and COGS**

| <b>OCAC Study Name</b>                                                     | <b>Abbrev.</b> | <b>Study Location</b>                                                                                             | <b>Study Type</b>              | <b>Controls</b> | <b>Cases<sup>1</sup></b> |
|----------------------------------------------------------------------------|----------------|-------------------------------------------------------------------------------------------------------------------|--------------------------------|-----------------|--------------------------|
| Australian Ovarian Cancer Study/Australian Cancer Study (Ovarian Cancer)   | AUS            | Australia                                                                                                         | Population based/ case-control | 977             | 880 (880)                |
| Bavarian Ovarian Cancer and Controls                                       | BAV            | Southeast Germany                                                                                                 | Population based/ case-control | 143             | 93 (93)                  |
| Belgian Ovarian Cancer Study                                               | BEL            | Belgium, University Hospital Leuven                                                                               | Hospital based/ Case-control   | 1,349           | 275 (274)                |
| Diseases of the Ovary and their Evaluation                                 | DOV            | USA: 13 counties in western Washington state                                                                      | Population based/ case-control | 1,487           | 904 (900)                |
| Oregon Ovarian Cancer Registry                                             | ORE            | USA: Portland, Oregon                                                                                             | Case only                      | 0               | 55 (52)                  |
| German Ovarian Cancer Study                                                | GER            | Germany: two geographical regions in the states of Baden-Württemberg and Rhineland-Palatinate in southern Germany | Population based/ case-control | 413             | 189 (183)                |
| Dr. Horst Schmidt Kliniken                                                 | HSK            | Germany                                                                                                           | Case only                      |                 | 144 (144)                |
| Hawaii Ovarian Cancer Control Study                                        | HAW            | USA: Hawaii                                                                                                       | Population based/ case-control | 157             | 60 (60)                  |
| Hannover-Jena Ovarian Cancer Study                                         | HJO            | Germany                                                                                                           | Hospital based/ Case-control   | 273             | 266 (0)                  |
| Hannover-Minsk Ovarian Cancer Study                                        | HMO            | Belarus                                                                                                           | Case-control                   | 138             | 143 (0)                  |
| Helsinki Ovarian Cancer Study                                              | HOC            | Helsinki, Finland                                                                                                 | Case-control                   | 447             | 221 (0)                  |
| Hormones and Ovarian Cancer Prediction                                     | HOP            | USA: Western PA, Northeastern Ohio, Western New York                                                              | Population based/ Case-control | 1,464           | 654 (633)                |
| Gilda Radner Familial Cancer Registry                                      | GRR            | USA: National                                                                                                     | Familial cancer/ Case only     |                 | 132 (0)                  |
| Women's Cancer Program at the Samuel Oschin Comprehensive Cancer Institute | LAX            | USA: Southern California                                                                                          | Case only                      |                 | 277 (276)                |
| Los Angeles County studies of Ovarian Cancer-1                             | USC            | USA: Los Angeles County, California                                                                               | Population based/ Case-control | 1047            | 689 (677)                |
| MALignant OVArrian Cancer                                                  | MAL            | Denmark                                                                                                           | Population based/ Case-control | 828             | 440 (440)                |
| Danish Pelvic Mass Study                                                   | PVD            | Denmark                                                                                                           | Case only                      | 0               | 169 (0)                  |
| Mayo Clinic Ovarian Cancer Control Study                                   | MAY            | USA: North Central (MN, SD, ND, IL, IA, WI)                                                                       | Clinic based/ Case-control     | 971             | 811 (808)                |
| Melbourne Collaborative Cohort                                             | MCC            | Melbourne, Australia                                                                                              | Cohort/ Nested                 | 66              | 63                       |

| <b>OCAC Study Name</b>                                                        | <b>Abbrev.</b> | <b>Study Location</b>                                              | <b>Study Type</b>                        | <b>Controls</b> | <b>Cases<sup>1</sup></b> |
|-------------------------------------------------------------------------------|----------------|--------------------------------------------------------------------|------------------------------------------|-----------------|--------------------------|
| Study                                                                         |                |                                                                    | case-control                             |                 | (0)                      |
| MD Anderson Ovarian Cancer Study                                              | MDA            | USA: Texas                                                         | Hospital based/<br>Case-control          | 384             | 373<br>(0)               |
| Memorial Sloan-Kettering Cancer Center                                        | MSK            | USA: New York City                                                 | Case-control                             | 593             | 467<br>(401)             |
| North Carolina Ovarian Cancer Study                                           | NCO            | USA: Central and eastern North Carolina (48 counties)              | Population based/<br>Case-control        | 826             | 761<br>(756)             |
| New England Case Control Study                                                | NEC            | USA: New Hampshire and Eastern Massachusetts                       | Population based/<br>Case-control        | 1,122           | 766<br>(677)             |
| Nurses' Health Study                                                          | NHS            | USA: National                                                      | Population based/<br>Nested case-control | 455             | 138<br>(0)               |
| New Jersey Ovarian Cancer Study                                               | NJO            | USA: New Jersey (six counties)                                     | Case-control                             | 181             | 169<br>(158)             |
| University of Bergen, Haukeland University Hospital, Norway                   | NOR            | Norway                                                             | Case-control                             | 371             | 237<br>(0)               |
| Nijmegen Ovarian Cancer Study                                                 | NTH            | Eastern part of the Netherlands                                    | Case-control                             | 323             | 255<br>(252)             |
| Ovarian Cancer in Alberta and British Columbia                                | OVA            | Alberta and British Columbia, Canada                               | Case-control                             | 748             | 631<br>(0)               |
| Polish Ovarian Cancer Study                                                   | POC            | Poland: Szczecin, Poznan, Opole, Rzeszów                           | Case-control                             | 417             | 422<br>(401)             |
| Polish Ovarian Cancer Case Control Study                                      | POL            | Poland: Warsaw, and Lodz                                           | Population based/<br>Case-control        | 741             | 260<br>(258)             |
| Study of Epidemiology and Risk Factors in Cancer Heredity                     | SEA            | UK: East Anglia and West Midlands                                  | Population based/<br>Case-control        | 6,024           | 1,385<br>(1,079)         |
| Family Registry for Ovarian Cancer and Genetic Epidemiology of Ovarian Cancer | STA            | USA: Six counties in the San Francisco Bay area                    | Population based/<br>Case-control        | 313             | 251<br>(250)             |
| Toronto Ovarian Cancer Study                                                  | TOR            | Canada: Province of Ontario                                        | Population based                         | 598             | 755<br>(0)               |
| University of California Irvine Ovarian Study                                 | UCI            | USA: Southern California (Orange and San-Diego, Imperial Counties) | Population based/<br>Case-control        | 367             | 277<br>(276)             |
| United Kingdom Ovarian Cancer Population Study                                | UKO            | UK: England, Wales and Northern Ireland                            | Population based/<br>Case-control        | 1,104           | 730<br>(712)             |
| Royal Marsden Hospital Cancer Study                                           | RMH            | UK: London                                                         | Hospital based/<br>Case only             | 0               | 154<br>(138)             |
| UK Familial Ovarian Cancer Registry                                           | UKR            | UK: National                                                       | Case only/<br>Familial register          | 0               | 47<br>(45)               |
| Southampton Ovarian Cancer Study                                              | SOC            | UK: Wessex region                                                  | Case only/<br>Hospital based             | 0               | 267<br>(76)              |

| <b>OCAC Study Name</b>                      | <b>Abbrev.</b> | <b>Study Location</b>                                                                       | <b>Study Type</b>                           | <b>Controls</b> | <b>Cases<sup>1</sup></b>   |
|---------------------------------------------|----------------|---------------------------------------------------------------------------------------------|---------------------------------------------|-----------------|----------------------------|
| Scottish Randomised Trial in Ovarian Cancer | SRO            | UK: coordinated through clinical trials unit, Glasgow UK from patients recruited world-wide | Case only/<br>Clinical trial                | 0               | 158<br>(135)               |
| Warsaw Ovarian Cancer Study                 | WOC            | Poland: Warsaw and central Poland                                                           | Case-control                                | 204             | 202<br>(151)               |
| Welcome Trust Case Control Consortium       | WTC            | United Kingdom                                                                              | Blood donors and 1958 Birth Cohort Controls | 6,118           |                            |
| <b>Total</b>                                |                |                                                                                             |                                             | <b>30,816</b>   | <b>15,397<br/>(11,398)</b> |

1. Number cases with survival time in parentheses

**Supplementary Table 4. Summary of genotyping data for each data set**

| GWAS       | Sub-study | Number (European ancestry) |                      | Genotyping array                 | Genotyping centre                                                                             | Number SNPs passing QC |
|------------|-----------|----------------------------|----------------------|----------------------------------|-----------------------------------------------------------------------------------------------|------------------------|
|            |           | Cases                      | Controls             |                                  |                                                                                               |                        |
| OCAC-iCOGS | Multiple  | 12,618 *<br>(11,030)       | 24,319 *<br>(21,693) | Illumina custom iSelect, "iCOGS" | McGill University and Génome Québec Innovation Centre and Mayo Clinic Medical Genome Facility | 199,570                |
| UK         | RMH       | 147                        |                      | Illumina 610K                    | Illumina Corporation                                                                          | 507,094                |
|            | SEA       | 1,078                      |                      |                                  |                                                                                               |                        |
|            | UKO       | 494                        |                      |                                  |                                                                                               |                        |
|            | UKR       | 44                         |                      |                                  |                                                                                               |                        |
|            | WTC       |                            | 6,118                | Illumina 550K                    | Sanger Centre                                                                                 | 507,094                |
|            | Total     | 1,763                      | 6,118                |                                  |                                                                                               |                        |
| Mayo       |           | 441                        | 442                  | Human Omni 2.5-8 BeadChip        | Mayo Clinic Medical Genome Facility                                                           | 1587042                |
| US         | MAY       | 359                        | 519                  | Illumina 610K                    | Mayo Clinic Medical Genome Facility                                                           | 556,480                |
|            | NCO       | 492                        | 654                  |                                  |                                                                                               |                        |
|            | TBO       | 227                        | 169                  |                                  |                                                                                               |                        |
|            | TOR       | 734                        | 524                  |                                  |                                                                                               |                        |
|            | NEC/BWH   | 132                        | 142                  | Illumina 317K                    | National Cancer Insitute                                                                      | 305,690                |
|            | POL       | 218                        | 555                  | Illumina 550K                    |                                                                                               | 527,435                |
|            | Total     | 2,162                      | 2,564                |                                  |                                                                                               |                        |

\* After exclusion of samples also genotyped in other GWAS



**Supplementary Table 5: Number of imputed variants by minor allele frequency**

| <b>Minor allele frequency in controls</b> | <b>Number</b> |
|-------------------------------------------|---------------|
| <1 per cent                               | 5779085       |
| [1 – 5) per cent                          | 2954998       |
| [5 – 10) per cent                         | 1396009       |
| [10 - 50] per cent                        | 5374631       |

## Supplementary Note 1

### Acknowledgements

#### ***Funding of constituent studies***

These are listed by funding agency, with each grant number in parentheses:

Funding of the constituent studies was provided by the American Cancer Society (CRTG-00-196-01-CCE); the California Cancer Research Program (00-01389V-20170, N01-CN25403, 2II0200); the Canadian Institutes for Health Research (MOP-86727); Cancer Council Victoria; Cancer Council Queensland; Cancer Council New South Wales; Cancer Council South Australia; Cancer Council Tasmania; Cancer Foundation of Western Australia; the Cancer Institute of New Jersey; Cancer Research UK (C490/A6187, C490/A10119, C490/A10124, C536/A13086, C536/A6689); the Celma Mastry Ovarian Cancer Foundation ; the Danish Cancer Society (94-222-52); the ELAN Program of the University of Erlangen-Nuremberg; the Eve Appeal; the Helsinki University Central Hospital Research Fund; Helse Vest; Imperial Experimental Cancer Research Centre (C1312/A15589); the Norwegian Cancer Society; the Norwegian Research Council; the Ovarian Cancer Research Fund; Nationaal Kankerplan of Belgium; Grant-in-Aid for the Third Term Comprehensive 10-Year Strategy for Cancer Control from the Ministry of Health Labour and Welfare of Japan; the L & S Milken Foundation; the Polish Ministry of Science and Higher Education (4 PO5C 028 14, 2 PO5A 068 27); Malaysian Ministry of Higher Education (UM.C/HIR/MOHE/06) and Cancer Research Initiatives Foundation; the Roswell Park Cancer Institute Alliance Foundation; the US National Cancer Institute (K07-CA095666, K07-CA143047, K22-CA138563, N01-CN55424, N01-PC067010, N01-PC035137, P01-CA017054, P01-CA087696, P30-CA15083, P50-CA105009, P50- CA136393, R01-CA014089, R01-CA016056, R01-CA017054, R01-CA049449, R01-CA050385, R01-CA054419, R01- CA058598, R01-CA058860, R01-CA061107, R01-CA061132, R01-CA063682, R01-CA064277, R01-CA067262, R01- CA071766, R01-CA074850, R01-CA076016, R01-CA080742, R01-CA080978, R01-CA083918, R01-CA087538, R01- CA092044, R01-095023, R01-CA106414, R01-CA122443, R01-CA112523, R01-CA114343, R01-CA126841, R01- CA136924, R01-CA149429, R03-CA113148, R03-CA115195, R37-CA070867, R37-CA70867, U01-CA069417, U01-CA071966 and Intramural research funds); the US Army Medical Research and Material Command (DAMD17-98-1- 8659, DAMD17-01-1-0729, DAMD17-02-1-0666, DAMD17-02-1-0669, W81XWH-10-1-0280); the National Health and Medical Research Council of Australia (199600 and 400281); the German Federal Ministry of Education and Research of Germany Programme of Clinical Biomedical Research (01 GB 9401); the state of Baden-Württemberg through Medical Faculty of the University of Ulm (P.685); the Minnesota Ovarian Cancer Alliance; the Mayo Foundation; the Fred C. and Katherine B. Andersen Foundation; the Lon V. Smith Foundation (LVS-39420); the Oak Foundation; the OHSU Foundation; the Mermaid I project; the Rudolf-Bartling Foundation; the UK National Institute for Health Research Biomedical Research Centres at the University of Cambridge, Imperial College London, University College Hospital “Womens Health Theme” and the Royal Marsden Hospital; WorkSafeBC.

## Supplementary Methods

### Summary of data sets

Genetic association analyses were carried out using data from several OCAC genotyping projects. The following numbers are for samples of European ancestry determined using genotype data. These included 2,162 cases and 2,564 controls from a GWAS from North America ("US GWAS"), 1,763 cases and 6,118 controls from a UK-based GWAS ("UK GWAS"), and 441 cases and 442 controls from a second GWAS from North America ("Mayo GWAS") 1-3. 11,030 cases and 21,693 controls from 41 OCAC studies were genotyped using the iCOGS array ("OCAC-iCOGS" stage 1 data). The US and UK GWASs comprised several independent case-control studies, and samples from some of these studies were also subsequently genotyped using the iCOGS array – all duplicates were removed from the analysis. Further details of the component studies are in Supplementary Table 3. Details of genotyping platform used for each data set are shown in Supplementary Table 4. All patient samples were collected with informed patient consent and under the approval of the institutional review board overseeing each study.

### Genotype data quality control

**UK GWAS:** Cases were from four studies (RMH, SEA, UKO and UKR) genotyped using the Illumina 610 Quad array. Controls were blood donor controls and 1958 Birth Cohort controls genotyped on the Illumina 550k array as part of the Wellcome Trust Case-Control Consortium. Quality control criteria were applied separately to the case and control sets because they were genotyped separately. SNPs exclusion criteria were: deviation of genotype frequencies from those expected under Hardy-Weinberg equilibrium at  $P < 10^{-4}$ , MAF  $< 1$  per cent, MAF between 1 and 5 per cent and call rate  $< 99$  per cent, MAF  $> 5$  per cent and call rate  $< 95$  per cent and test for trend by genotype between the two control sets was significant at  $P < 10^{-4}$ . In a union between two data sets 507,094 SNPs passed QC.

**US GWAS:** Four case controls studies (MAY, NCO, TBO and TOR) were genotyped using the Illumina 660K array, the NEC case-control study was genotyped using the Illumina 370k and Illumina 317K array and the POL case control study was genotyped using the Illumina 550k array. QC was carried out separately for the three data sets. SNPs exclusion criteria were: deviation of genotype frequencies from those expected under Hardy-Weinberg equilibrium at  $P < 10^{-5}$ , MAF  $< 1$  per cent, MAF between 1 and 5 per cent and call rate  $< 99$  per cent, MAF  $> 5$  per cent and call rate  $< 95$  per cent. The number of SNPs passing QC was 556,480 (MAY, NEC, NCO, TBO, TOR), 305,690 (NEC/BWH) and 527,435 (POL).

**Mayo GWAS:** SNPs exclusion criteria were: deviation of genotype frequencies from those expected under Hardy-Weinberg equilibrium at  $P < 10^{-5}$ , fewer than 5 heterozygotes, MAF  $< 5$  per cent and call rate  $< 99$  per cent, MAF  $> 5$  per cent and call rate  $< 95$  per cent. 622568 SNPs failed QC leaving 1587042 for analysis.

**COGS:** SNPs exclusion criteria were: deviation of genotype frequencies from those expected under Hardy-Weinberg equilibrium at  $P < 10^{-5}$ , fewer than 5 heterozygotes, MAF  $< 5$  per cent and call rate  $< 99$  per cent, MAF  $> 5$  per cent and call rate  $< 95$  per cent. Of 211,155 SNP assays successfully designed and included on the array 199,570 passed QC.

### Sample QC

**UK GWAS:** Exclusion criteria were: conversion rate  $< 80$  per cent ambiguous gender, unresolved genotype duplicates and less than 90 per cent European ancestry using the programme program LAMP4 and reference genotypes from HapMap (release 22) and subjects. Final sample size was 1,763 cases and 6,118 controls.

**US GWAS:** Exclusion criteria were: conversion rate  $< 95$  percent, ambiguous gender, unresolved genotype duplicates and less than 80 per cent European ancestry using STRUCTURE. This resulted in a final sample size of 2,162 cases and 2,564 controls.

**Mayo GWAS:** Exclusion criteria were: samples with a conversion rate of less than 95 percent, samples with heterozygosity  $> 5$  standard deviations from the intercontinental ancestry specific mean heterozygosity, samples with ambiguous sex, samples with the lowest call rate from a first-degree

relative pair and samples that were either duplicate samples that were non-concordant for genotype or genotypic duplicates that were not concordant for phenotype. A total of 907 subjects including 453 cases and 454 controls were available for analysis, of which 441 cases and 442 controls were of European ancestry.

COGS: Exclusion criteria were: samples with a conversion rate of less than 95 percent, samples with heterozygosity >5 standard deviations from the intercontinental ancestry specific mean heterozygosity, samples with ambiguous sex, samples with the lowest call rate from a first-degree relative pair and samples that were either duplicate samples that were non-concordant for genotype or genotypic duplicates that were not concordant for phenotype. A total of 44,308 subjects including 18,174 cases and 26,134 controls were available for analysis. Of these 5,556 cases and 1,816 were included in one of the GWAS leaving 12,618 cases and 24,318 controls unique samples. There were 11,030 cases and 21,693 controls of European ancestry.

Imputation.

The number of successfully imputed SNPs (by minor allele frequency) is shown in Supplementary Table 5.

## References

1. Permeth-Wey, J. *et al.* LIN28B Polymorphisms Influence Susceptibility to Epithelial Ovarian Cancer. *Cancer Research* **71**, 3896-3903 (2011).
2. Song, H. *et al.* A genome-wide association study identifies a new ovarian cancer susceptibility locus on 9p22.2. *Nat Genet* **41**, 996-1000 (2009).
3. Kuchenbaecker, K.B. *et al.* Identification of six new susceptibility loci for invasive epithelial ovarian cancer. *Nat Genet* **47**, 164-71 (2015).
4. Sankararaman, S., Sridhar, S., Kimmel, G. & Halperin, E. Estimating local ancestry in admixed populations. *Am J Hum Genet* **82**, 290-303 (2008).
